# Supplementary material for: Performance of Rapid Diagnostic Tests for Malaria Diagnosis in Mali
Source: Preprints.org preprint supplement (doi:10.20944/preprints202311.1579.v1), 2023-11-26
Supplement: Supplementary file 1 [file supplementary]

**Table S1** Detail of the total number and the prevalence of positive and negative Malaria Rapid Diagnostic Tests in each health center.

| Area | Health district | RDT collection site | Result | | Total |
| --- | --- | --- | --- | --- | --- |
|
| **Positive N (%)** | **Négative N (%)** |
| Kayes | Diéma | Torodo | 6 (2.2) | 272(97.8) | 278 |
|  |  | Lakamané | 0 (0.0) | 89 (100) | 89 |
|  |  | Lattakaf | 0 (0.0) | 47 (100) | 47 |
|  |  | Débomassassi | 0 (0.0) | 48 (100) | 48 |
|  |  | Koungo | 3 (75.0) | 1 (25.0) | 4 |
|  |  | Lambidou | 0 (0.0) | 13 (100) | 13 |
|  | Yélimané | kodié | 12 (19.0) | 51(81.0) | 63 |
|  |  | Csréf | 6 (4,1) | 139 (95.9) | 145 |
|  |  | Dogofry | 0 (0.0) | 23 (100.0) | 23 |
|  |  | Bandiougoula | 0 (0.0) | 11 (100.0) | 11 |
| sub total |  |  | **27 (3.7)** | **694 (96.3)** | **721** |
| Koulikoro | Nara | Bagoini | 0 (0.0) | 50 (100.0) | 50 |
|  |  | Mourdiah | 0 (0.0) | 68 (100.0) | 68 |
|  |  | Kassakaré | 4 (12.1) | 29 (87.9) | 33 |
|  |  | Alasso | 1 (3.4) | 28 (96.6) | 29 |
|  |  | Tiapato | 3 (14.3) | 18 (85.7) | 21 |
|  |  | Waourou | 0 (0.0) | 13 (100.0) | 13 |
|  | Kangaba | Naréna | 2 (1.6) | 126 (98.4) | 128 |
|  |  | Cscom Central | 14 (28.0) | 36 (72.0) | 50 |
|  |  | Séléfougou | 0 (0.0) | 30 (100.0) | 30 |
| sub total |  |  | **24 (5.7)** | **398 (94.3)** | **422** |
| Sikasso | Kadiolo | cscom central | 110 (59.5) | 75 (40.5) | 185 |
|  |  | Zégoua | 28 (38.89) | 44 (61.1) | 72 |
| sub total |  |  | **138 (53.7)** | **119 (46.3)** | **257** |
| Segou | Barouéli | Cscom Central | 5 (41.7) | 7 (58.3) | 12 |
|  |  | Dioforogo | 13 (65.0) | 7 (35.0) | 20 |
|  |  | Tamani | 7 (35.0) | 13 (65.0) | 20 |
|  |  | NGara | 16 (80.0) | 4 (20.0) | 20 |
|  |  | Tigui | 20 (100.0) | 0 (0.0) | 20 |
|  |  | bananido | 7 (50.0) | 7 (50.0) | 14 |
|  |  | N'Gossola | 5 (31.3) | 11(68.75) | 16 |
|  |  | Nianzana | 20 (66.7) | 10 (33.3) | 30 |
|  |  | yerebougou | 16 (80.0) | 4 (20.0) | 20 |
|  |  | Csréf | 8 (40.0) | 12 (60.0) | 20 |
|  |  | Ndjila | 10 (50.0) | 10 (50.0) | 20 |
| sub total |  |  | **127 (59.9)** | **85 (40.1)** | **212** |
| Mopti | Mopti | Soufouroulaye | 79 (34.3) | 151 (65.7) | 230 |
|  |  | Fatoma | 0 (0.0) | 35 (100.0) | 35 |
|  |  | Sévaré II | 136 (91.9) | 12 (8.1) | 148 |
| sub total |  |  | **215 (52.1)** | **198 (47.9)** | **413** |
| Tombouctou |  | Gourma Rharous | 400 (66.9) | 198 (33.1) | 598 |
| Gao | Gao | Csref d'Ansongo | 30 (13.4) | 194 (86.6) | 224 |
| Menaka | Ménaka | Menaka | 21 (36.8) | 36 (63.2) | 57 |
| Kidal | Kidal | Cscom d'Aliou | 0 (0.0) | 54 (100.0) | 54 |
|  | CSRéf de Kidal | 20 (10.3) | 120 (85.7) | 140 |
| sub total |  |  | **20 (10.3)** | **174 (89.7)** | **194** |
| Total |  |  | **1002 (32.3)** | **2096 (67.7)** | **3098** |

3098 RDT cassettes were collected at the various study sites, of which 67.7 were malaria-negatives.
